# Supplementary material
Source: publisher figshare collection journal article supplement (https://aacr.figshare.com/articles/dataset/_/22402403)
Supplement: Supplementary file 1 [file 39848198]

## **Supplementary materials for methods**

### **Antibodies used**

Miltenyi Biotec - EpCAM-PE (130-091-733), EpCAM-APC (130-091-254), CD44-APC (130-095-177), CD117-PE (130-091-735), CD117-APC (130-091-733), CD133/1-PE (130-080-801), CD133/1-APC (130-090-826); BD Biosciences - CD44-PE (555479), H2Kd-FITC (553565); eBioscience - GlyA-FITC (11 -9987), CD45-PE (12-0459); Biolegend - CD45-FITC (304006), H2Kd-Pacific Blue (116616) EpCAM (9C4); Beckman Coulter – CD24-PE (IM1428U); R&D Biosystems - CD166-PE (FAB6561P); Santa Cruz - p53 (FL-393).

### **Cloning and transfection of CD44 constructs**

pBabe-CD44s was purchased from Addgene. Sequence analysis revealed three amino acid differences between this construct and CD44s sequence (NM\_001001391). We performed three rounds of mutagenesis (T255C, A326C, A716G) to generate the correct CD44s sequence, which was cloned into pcDNA3 (Invitrogen). pcDNA3-CD44v8-10 was amplified from GC21 xenograft cells by PCR and cloned into pcDNA3. pcDNA3-soluble (sol-) CD44s construct was generated by introducing a stop codon just before the transmembrane region (CD44s aa268). Soluble (sol-) CD44v8-10 was generated from sol-CD44s by addition of variant exons 8-10, which were amplified by PCR from GC21 xenograft cells. Transfections were performed using Lipofectamine 2000 (Invitrogen). Briefly, DNA plasmids diluted in Opti-MEM (Invitrogen) were incubated with Lipofectamine 2000/Opti-MEM mixture and incubated for 20 minutes at room temperature before adding to cells in complete media (10% FBS/DMEM). Amount of DNA and Lipofectamine 2000 was used in accordance to manufacturer's protocol (Invitrogen).

### **Immunoblotting**

Total protein was extracted from primary gastric cancer cells GC38-adh or MKN28 gastric cancer cells stably expressing CD44s and CD44v8-10. Cells were sorted for the respective populations using CD44s or CD44v8-10 specific antibodies and passaged twice before immunoblot analysis. Cells were lysed for 15 minutes on ice in buffer containing 150mM NaCl, 10mM Tris-HCl pH 7.4, 5mM EDTA, 1% Triton X-100 and 1x complete protease inhibitor cocktail (Roche) before collection of lysate supernatant by centrifugation at 14,000g, 4°C. Equal amounts of protein (80-100µg) as quantitated by Bradford assay were resolved by 8% SDS-PAGE. Resolved proteins were transferred to nitrocellulose membranes (Whatman), blocked in 5% milk-TBST and probed with CD44s antibody (BBA10, R&D

Biosystems) or actin (A2066, Sigma). Membranes were incubated with horseradish peroxidase-conjugated antibodies against mouse or rabbit IgG (Amersham) and binding detected by chemiluminescence (Immobilon-P, Millipore) signal on x-ray film (Thermo Scientific).

#### **PCR and real-time quantitative PCR (qPCR) analysis**

RNA was purified from finely minced xenograft tumors and sorted cells ( $7 \times 10^4$  to  $2 \times 10^5$ ) using RNeasy Micro kit (Qiagen), and reverse transcription and PCR amplification was performed using the OneStep RT-PCR kit (Qiagen). Conventional PCR was performed using GoTaq (Promega) and qPCR analysis was performed using the QuantiTect SYBR Green RT-PCR kit (Qiagen) according to the following parameters: 1 cycle (95°C for 3 min) and 40 cycles (95 °C for 15 sec, 55 °C for 30 sec and 72 °C for 30 sec). Amplification of 18S rRNA was used as internal control. Relative expression among samples was calculated by comparison with internal controls using the comparative quantitation method (Rotorgene). Gene specific primers are listed in Supplementary Table M1.

#### **In vitro sphere-forming assay**

Primary spheroids were derived from GC38 xenograft tumor by plating the tumor explant on ultralow attachment plates (Corning Costar) in serum-free DMEM/F12 medium (Invitrogen) containing 20 ng/ml human recombinant epidermal growth factor (EGF; PeproTech), 10 ng/ml human recombinant basic fibroblast growth factor (bFGF; PeproTech), B27 (Invitrogen), N2 (Invitrogen), 1 ng/ml hydrocortisone (Sigma-Aldrich), 5 µg/ml insulin (Sigma-Aldrich), and 0.4% BSA Fraction V (Sigma-Aldrich). Spheroids formed were dissociated using TrypLE™ Select (Invitrogen) that can be inactivated by dilution. For in vitro sphere-forming assay, cells were seeded in six-well ultralow attachment plates (Corning Costar) at densities of 50, 500 and 5000 cells per well and cultured in 2ml of the above mentioned serum-free media. 10 days after plating of the cells, the number of spheres was counted under phase-contrast microscopy (IX71, Olympus).

#### **Spheroid immunofluorescence studies**

Spheroids were deposited by cytopspin onto glass slides, fixed in ice-cold 4% paraformaldehyde (4°C, 10 min), and blocked (1 h with normal serum). An indirect immunofluorescent labeling technique was used to identify EpCAM-expressing and p53-expressing cells using anti-EpCAM (9C4) and anti-p53 (FL-393) antibodies in PBS with 1% Triton X-100 and 2% normal serum (1 h at room temperature). Slides were washed (PBS, 5 min) and incubated in the dark at room temperature for 30 min with

Alexa Fluor® 488-conjugated goat anti-mouse (against anti-EpCAM) and Alexa Fluor® 546-conjugated goat anti-rabbit (against anti-p53).

**Table M1. Primer sequences**

| Gene                                                                      | Accession Number (NCBI) | Sequences (5'-3')                                                      | Product size |
|---------------------------------------------------------------------------|-------------------------|------------------------------------------------------------------------|--------------|
| CD44                                                                      | NM_001001391            | Fw: 5' AAGACATCTACCCCAGCAAC 3'                                         | 324 bp       |
|                                                                           |                         | Rv: 5' CCAAGATGATCAGCCATTCTGG 3'                                       | 720 bp       |
| β-Actin                                                                   | NM_001101               | Fw: 5' CGTGGGGCGCCCCAGGCACCA 3'<br>Rv: 5' GATCTGGGTCATCTTCTCGCG 3'     | 265 bp       |
| 18S rRNA                                                                  | NR_003286               | Fw: 5' CCTGCGGCTTAATTTGACTC 3'<br>Rv: 5' CGC TGA GCC AGT CAG TGT AG 3' | 319 bp       |
| CD44s                                                                     | NM_001001391            | Fw: 5' CATCTACCCCAGCAACCCTA 3'<br>Rv: 5' CTTGGTCTCTGGTAGCAGGGA 3'      | 176 bp       |
| CD44v8-10                                                                 | NM_001001390            | Fw: 5' AGAATCCCTGCTACCAATATGGACTC 3'<br>Rv: 5' AGGTCACTGGGATGAAGGTC 3' | 334 bp       |
| CD44v6                                                                    | (v1) NM_000610          | Fw: 5' AGGAACAGTGGTTTGGCAAC 3'                                         | 68 bp        |
|                                                                           | (v2) NM_001001389       | Rv: 5' CGAATGGGAGTCTTCTCTGG 3'                                         |              |
| PTPRC (CD45)                                                              | (v1) NM_002838          | Fw: 5' AGCACCTACCCTGCTCAGAA 3'                                         | 159 bp       |
|                                                                           | (v2) NM_080921          | Rv: 5' TTCAGCCTGTTCCCTTTGCTT 3'                                        |              |
| <b>shRNA sequences (Origene)</b>                                          |                         |                                                                        |              |
| Gi356314                                                                  | NM_000610               | GCTGACCTCTGCAAGGCTTTCAATAGCAC                                          |              |
| Gi356315                                                                  | NM_000610               | GACAGAAAGCCAAGTGGACTCAACGGAGA                                          |              |
| Scrambled control                                                         | NM_000610               | GCACTACCAGAGCTAACTCAGATAGTACT                                          |              |
| <b>Mutagenesis primers for CD44s and CD44R shRNA-resistant constructs</b> |                         |                                                                        |              |
| CD44_mut314                                                               | NM_001001390            | Fw: 5' CTGACCTCTGCAA <u>AGC</u> TTCAATAGCACCTTGCC 3'                   |              |
|                                                                           | NM_001001391            | Rv: 5' GCAAGGTGCTATTGA <u>AGC</u> TTTGCAGAGGTCAGC 3'                   |              |
| CD44_mut315                                                               | NM_001001390            | Fw: 5' GGACAGAAAGCCAAG <u>CGG</u> ICTCAACGGAGAGGCCA 3'                 |              |
|                                                                           | NM_001001391            | Rv: 5' TGGCCTCTCCGTTGAG <u>ACCG</u> CTTGGCTTCTGTCC 3'                  |              |
